# Supplementary material for: An integrative computational model for large-scale identification of metalloproteins in microbial genomes: a focus on iron–sulfur cluster proteins
Source: Royal Society of Chemistry journal article supplement (doi:10.1039/c4mt00156g), 2014-08-07
Supplement: c4mt00156g1.pdf [file c4mt00156g1.pdf]

## Supplementary Figure 2 – Estellon et al.

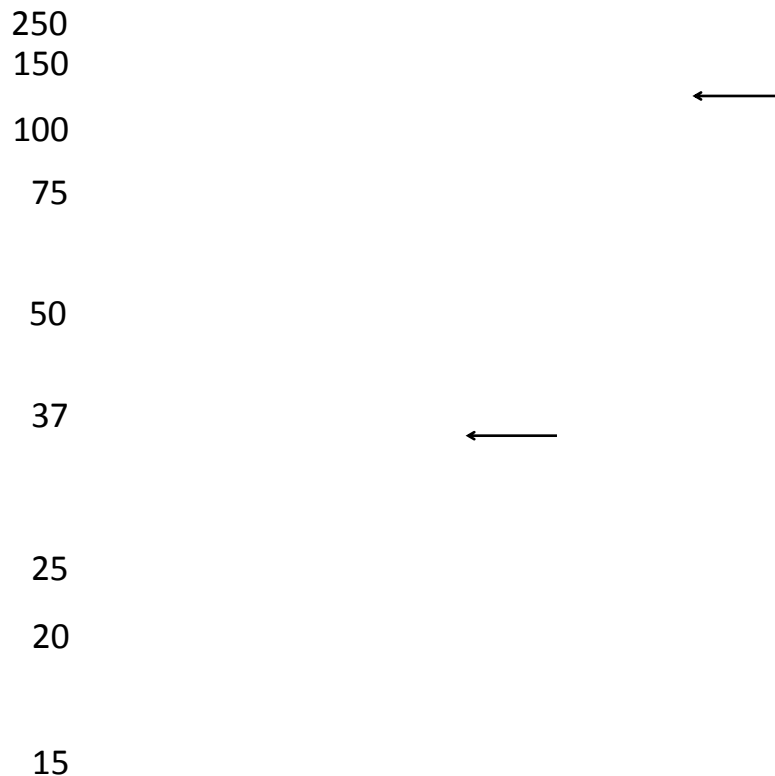

- 1: Standard molecular weights
- 2: BL21(DE3)YhcC before induction
- 2: BL21(DE3)YhcC after induction (3h)
- 3: BL21(DE3)YdiJ before induction
- 4: BL21(DE3)YdiJ after induction (2.5h)
